# Supplementary material for: Network-Assisted Systems Biology Analysis of the Mitochondrial Proteome in a Pre-Clinical Model of Ischemia, Revascularization and Post-Conditioning
Source: MDPI journal article supplement (doi:10.3390/ijms23042087), 2022-02-14

**Table S1.** Changes in mitochondrial proteins detected in the swine at-risk myocardial proteome.

| Protein name                                                                                   | Symbol  | Isch vs. Sham | I/R vs. Isch | PostC vs. Isch | PostC vs. I/R |
|------------------------------------------------------------------------------------------------|---------|---------------|--------------|----------------|---------------|
| Voltage-dependent anion-selective channel protein 1                                            | VDAC1   | ↓ -1.84       | N.D.         | ↑ 3.45         | N.D.          |
| D-beta-hydroxybutyrate dehydrogenase                                                           | BDH1    | → 0.41        | N.D.         | ↑ 2.48         | N.D.          |
| Mitochondrial inner membrane protein                                                           | OXA1L   | ↓ -0.57       | ↓ -1.87      | ↑ 1.66         | ↑ 3.53        |
| Voltage-dependent anion-selective channel protein 2                                            | VDAC2   | → 0.04        | ↓ -0.94      | ↑ 2.08         | ↑ 3.02        |
| Dihydropolyl dehydrogenase                                                                     | DLD     | ↓ -1.95       | → -0.18      | ↑ 2.40         | ↑ 2.58        |
| Cytochrome b-c1 complex subunit 1                                                              | UQCRC1  | → -0.12       | ↓ -0.59      | ↑ 1.95         | ↑ 2.54        |
| NADH-ubiquinone oxidoreductase                                                                 | MT-ND2  | ↓ -0.60       | → -0.30      | ↑ 2.16         | ↑ 2.46        |
| Electron transfer flavoprotein subunit beta                                                    | ETFB    | ↑ 0.68        | ↓ -1.28      | ↑ 0.70         | ↑ 1.98        |
| Protein DJ-1                                                                                   | PARK7   | ↑ 0.62        | → -0.19      | ↑ 1.74         | ↑ 1.93        |
| NADH dehydrogenase [ubiquinone] flavoprotein 1                                                 | NDUFB1  | → -0.15       | ↓ -0.58      | ↑ 1.30         | ↑ 1.87        |
| Stress-70 protein, mitochondrial                                                               | HSPA9   | ↓ -0.67       | → -0.24      | ↑ 1.37         | ↑ 1.62        |
| ATP synthase beta subunit                                                                      | ATP5F1  | → -0.06       | ↓ -1.04      | ↑ 0.58         | ↑ 1.61        |
| Succinyl-CoA:3-ketoacid-coenzyme                                                               | OXCT1   | → 0.01        | → -0.39      | ↑ 1.08         | ↑ 1.47        |
| Cytochrome b-c1 complex subunit Rieske                                                         | UQCRCF1 | → 0.40        | ↓ -1.36      | → 0.10         | ↑ 1.46        |
| Dihydropolylsine-residue succinyltransferase component of 2-oxoglutarate dehydrogenase complex | DLST    | → -0.29       | → 0.03       | ↑ 1.21         | ↑ 1.17        |
| Hydroxyacyl-coenzyme A dehydrogenase                                                           | HADH    | → 0.33        | ↓ -1.06      | → 0.07         | ↑ 1.13        |
| Ubiquinone biosynthesis protein COQ9                                                           | COQ9    | → -0.24       | → -0.29      | ↑ 0.75         | ↑ 1.04        |
| Isocitrate dehydrogenase [NAD] subunit alpha                                                   | IDH3A   | → -0.42       | ↓ -0.98      | → 0.01         | ↑ 0.99        |
| Succinyl-CoA ligase [ADP-forming] subunit beta                                                 | SUCLA2  | ↓ -0.57       | → -0.27      | ↑ 0.51         | ↑ 0.78        |
| Pyruvate dehydrogenase                                                                         | PDHA1   | → 0.18        | ↓ -0.84      | → -0.08        | ↑ 0.75        |
| Isocitrate dehydrogenase [NADPH]                                                               | IDH2    | ↑ 0.66        | ↓ -0.77      | → -0.05        | ↑ 0.72        |
| Heart aconitase                                                                                | ACO2    | → 0.12        | → 0.07       | ↑ 0.72         | ↑ 0.65        |
| ATP synthase subunit alpha                                                                     | ATP5A1  | ↓ -0.70       | → -0.08      | ↑ 0.54         | ↑ 0.63        |
| Electron transfer flavoprotein-ubiquinone oxidoreductase                                       | ETFDH   | ↓ -0.50       | ↑ 0.55       | ↑ 1.13         | ↑ 0.57        |
| Superoxide dismutase                                                                           | SOD1    | → 0.01        | → 0.15       | ↑ 0.52         | → 0.37        |
| 2 oxoglutarate dehydrogenase                                                                   | OGDH    | → -0.31       | ↑ 0.52       | ↑ 0.77         | → 0.24        |

**Table S2.** Wikipathways enrichment analysis result of the differentially regulated proteins detected across ischemia, revascularization, and post-conditioning.

| <b>WP_id</b> | <b>Term description</b>                                           | <b>Strength</b> | <b>FDR</b> |
|--------------|-------------------------------------------------------------------|-----------------|------------|
| WP2453       | TCA cycle and deficiency of pyruvate dehydrogenase complex (PDHc) | 2.47            | 2.90E-10   |
| WP78         | TCA cycle (aka Krebs or citric acid cycle)                        | 2.42            | 2.90E-10   |
| WP3925       | Amino acid metabolism                                             | 1.78            | 1.64E-08   |
| WP111        | Electron transport chain: OXPHOS system in mitochondria           | 1.66            | 1.83E-06   |
| WP4932       | 7q11.23 copy number variation syndrome                            | 1.58            | 8.26E-05   |
| WP4290       | Metabolic reprogramming in colon cancer                           | 1.87            | 9.45E-05   |
| WP623        | Oxidative phosphorylation                                         | 1.72            | 0.00031    |
| WP311        | Ketone bodies synthesis and degradation                           | 2.5             | 0.0071     |
| WP4236       | Krebs cycle disorders                                             | 2.35            | 0.0109     |
| WP4742       | Ketogenesis and ketolysis                                         | 2.29            | 0.0122     |
| WP4297       | Thiamine metabolic pathways                                       | 2.24            | 0.0136     |
| WP5037       | Riboflavin and CoQ disorders                                      | 2.05            | 0.027      |
| WP4921       | Mitochondrial complex III assembly                                | 1.99            | 0.0318     |

**Figure S1.** Cardioprotection conferred by post-conditioning. **A.** Left ventricular ejection fraction (LVEF) at baseline, at 90 min post AMI, and at sacrifice. (90 min post AMI and sacrifice are the same for Isch. group) **B.** Infarct size measurement expressed as a percentage of the area at risk (AAR). **C.** Scheme illustrating the experimental procedure timeline for each group. Red arrows indicate sacrifice. Data is presented as mean  $\pm$  standard error. (\*  $p < 0.05$ ).

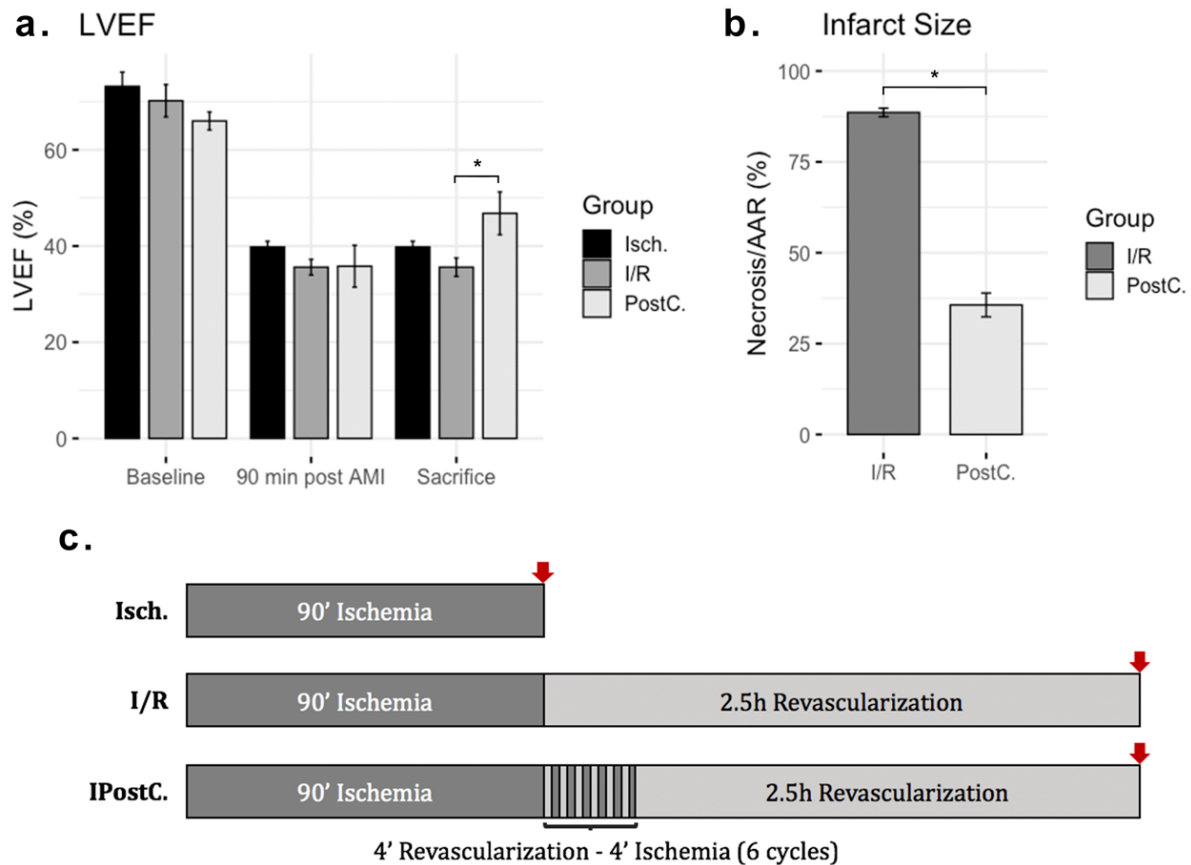

**Figure S2.** Multi two-group Gardner-Altman estimation plots of the ETC identified members across all conditions. The bootstrap distribution of the unpaired mean difference between each condition and the sham is depicted (gray shadow). **A.** ETC complex I. **B.** ETC complex III. **C.** ETC complex V.

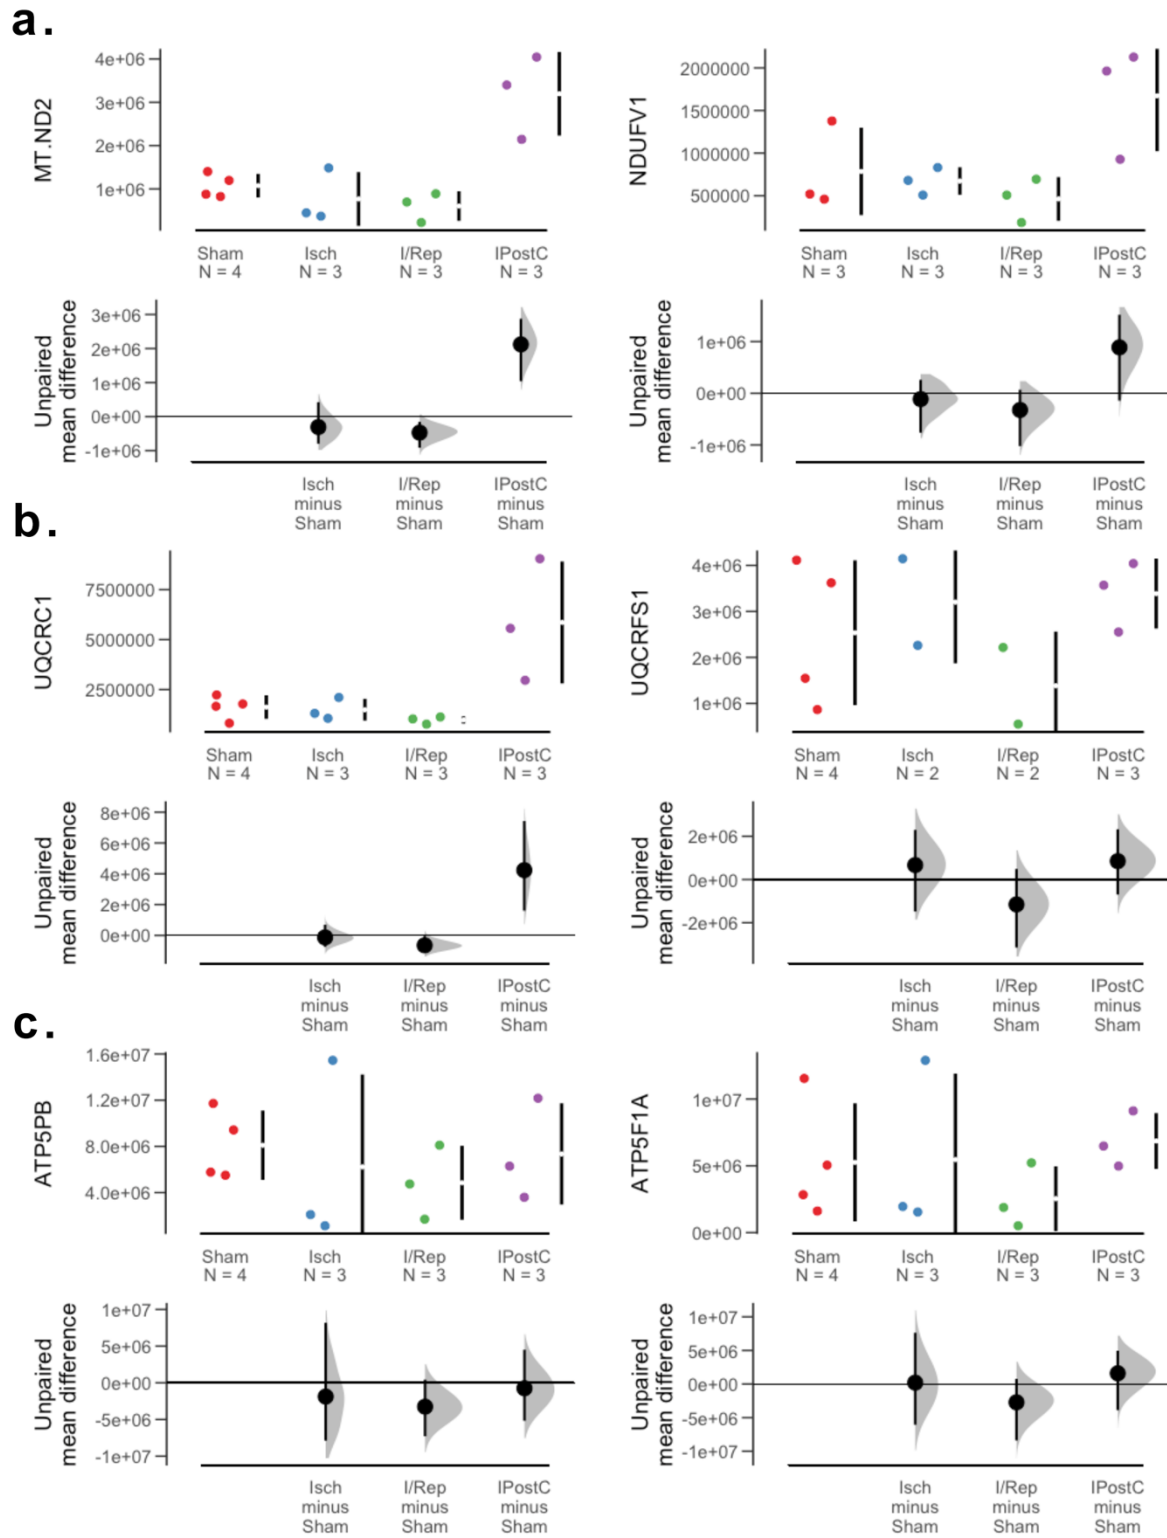

**Figure S3.** Multi two-group Gardner-Altman estimation plots of VDAC2, DJ-1, and HSPA9.

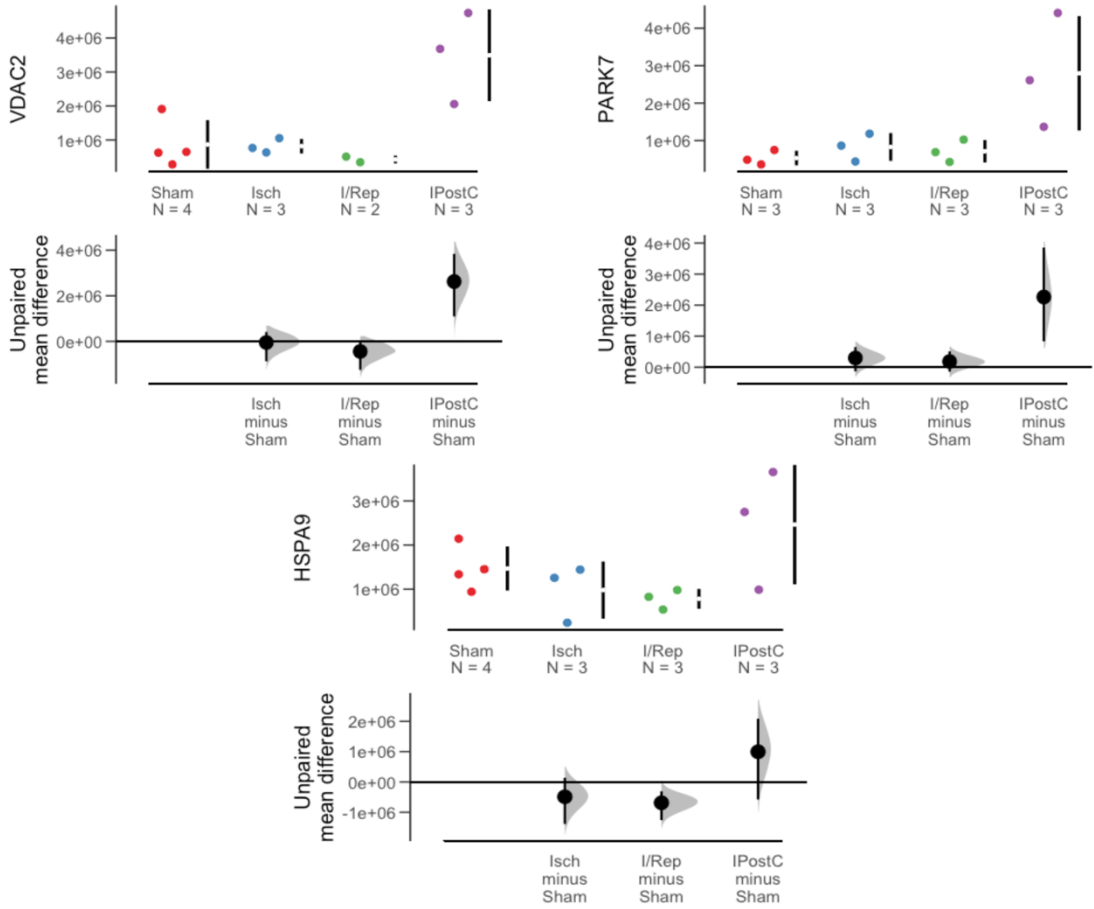

Supplement: s1 [file s1]
